# Supplementary material for: Silicate anion-stabilized layered magnesium–aluminium hydrotalcite
Source: Royal Society of Chemistry journal article supplement (doi:10.1039/c3ra42563k), 2013-01-01
Supplement: c3ra42563k.pdf [file c3ra42563k.pdf]

**Supplementary information on:**

**Silicate Anion-Stabilized Layered Magnesium–Aluminium Hydrotalcite**

*Thangaraj Baskaran, Raju Kumaravel, Jayaraj Christopher<sup>b</sup>, Ayyamperumal Sakthivel<sup>\*</sup>*

*Received (in XXX, XXX) Xth XXXXXXXXXX 20XX, Accepted Xth XXXXXXXXXX 20XX*

*DOI: 10.1039/b000000x*

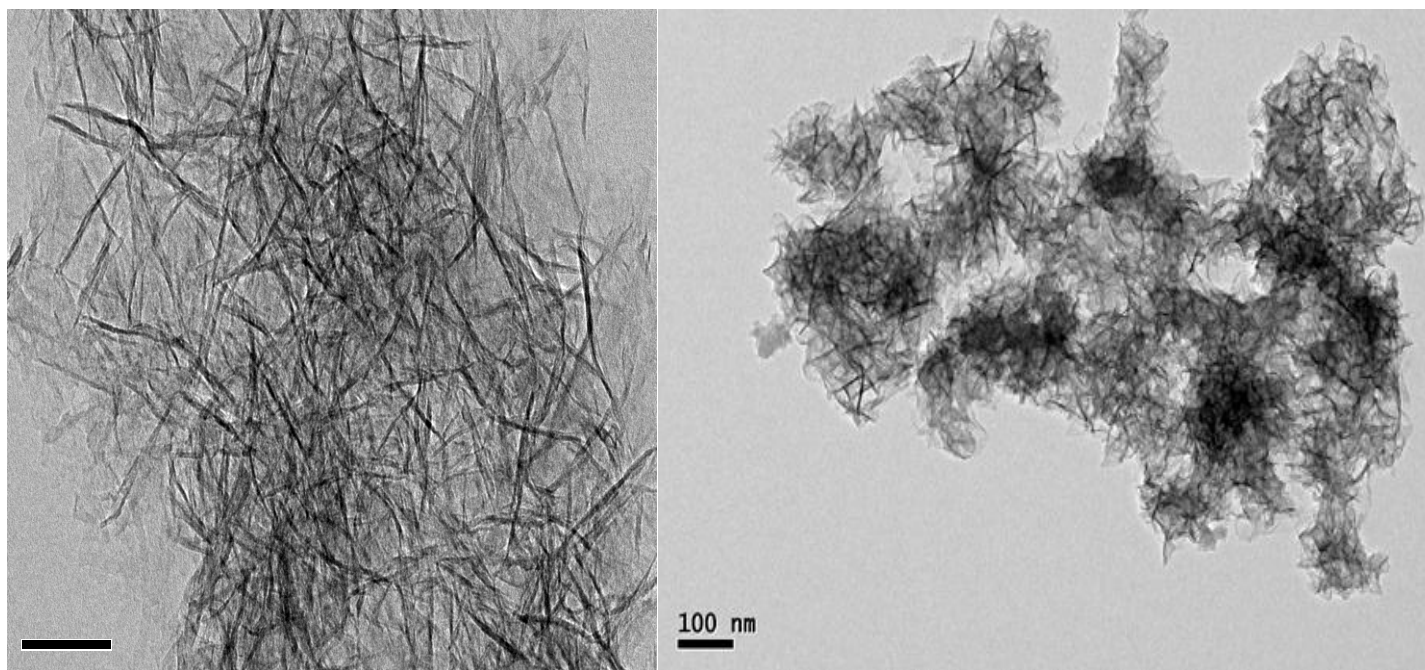

**Fig. S1** TEM images of calcined HT-Si6.

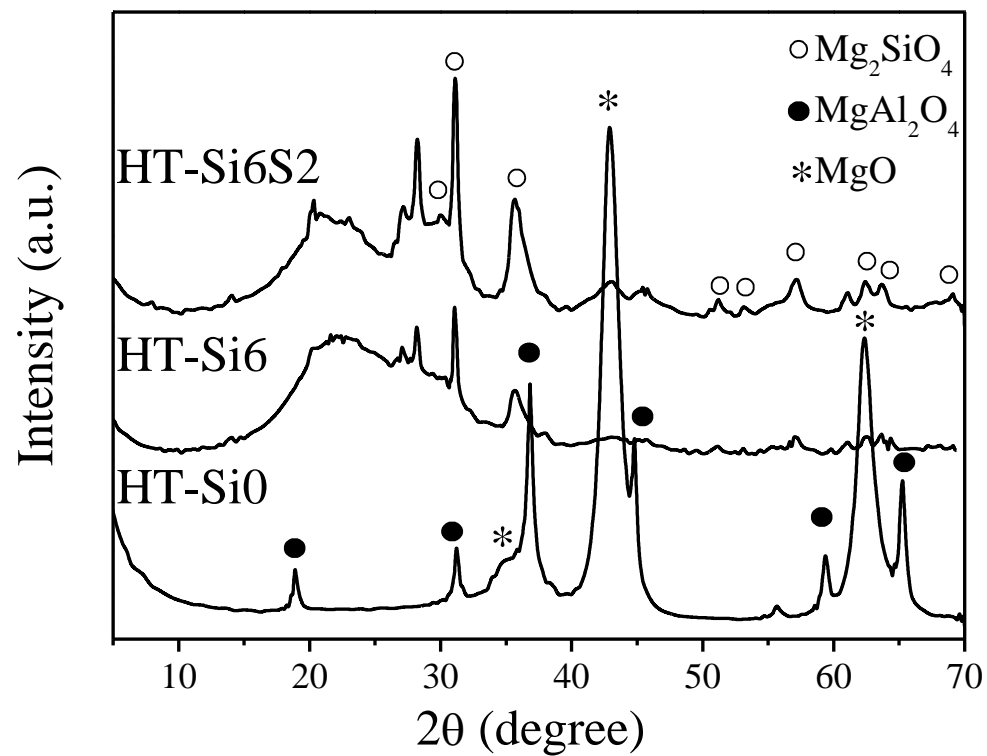

**Fig. S2** XRD patterns of various HT samples calcined at 800 .
